# Supplementary material
Source: PubMed Central journal article supplement (PMC548434)
Supplement: jvirol_79_5_2941__1.pdf [file jvirol_79_5_2941__1.pdf]

**Supplementary Table B**

| 1            | 2     | 3     | 4    | 5        | 6      | 7        |                        | 8        | 9        | 10             | 11            | 12                       |
|--------------|-------|-------|------|----------|--------|----------|------------------------|----------|----------|----------------|---------------|--------------------------|
| PV no.       | SCORE | START | END  | IDENTITY | STRAND | POSITION | ACCESSION NO           | 5'LTR14C | 3'LTR14C | LTR similarity | Repeats in PV | PV in Repeats            |
| 1CI          | 7203  | 0     | 7417 | 98.6%    | -      | 16p12.3  | AC130456.2             | +        | +        | 91             |               | L2                       |
| 2CI          | 6321  | 0     | 7417 | 93.1%    | -      | 15q21.1  | AC051619.7             | +        | +        | 92             | AluSg/x       | AluSg/x                  |
| 3CI          | 6160  | 7     | 7392 | 92.3%    | +      | 2p12     | AC079896.6             | +        | +        | 91             |               | THE1B-int                |
| 4CI          | 5871  | 7     | 7417 | 92.2%    | +      | 13q31.1  | AL445588.12            | +        | +        | 85             |               | MER4(C)-int              |
| 5CI          | 4715  | 0     | 5654 | 92.1%    | -      | 4q33     | AC069306.6             | +        |          |                | LTR12         |                          |
| 6CI          | 3895  | 2833  | 7417 | 92.7%    | +      | 8q24.3   | AF235103.4             |          |          |                | LTR5B, HERVK  |                          |
| 7CI          | 3735  | 15    | 7417 | 91.2%    | +      | 6p12.3   | AL391538.11            | +        | +        | 89             | AluY          |                          |
| 8CI          | 3575  | 8     | 7411 | 89.5%    | -      | Yq11.223 | AC010086.4             | +        | +        | 83             | AluY          |                          |
| 9Cla, b      | 3573  | 0     | 7410 | 89.5%    | +      | Yq11.221 | /                      | +        | +        | 83             |               | MER117, MER20            |
| 10CI         | 3456  | 7     | 7401 | 91.5%    | +      | 1q44     | AL627095.8/AL390728.37 |          | +        |                | AluY          |                          |
| 11CI         | 3352  | 28    | 7414 | 88.8%    | -      | Yp11.2   | AC009952.4             | +        | +        | 86             | AluYc         |                          |
| 12CI         | 3348  | 18    | 7414 | 88.7%    | +      | Yq11.223 | AC021107.3             | +        | +        | 84             | AluYc         |                          |
| 13CI         | 3231  | 18    | 7266 | 88.6%    | -      | Yq11.223 | AC024236.5/AC007322.4  | +        | +        | 86             | AluYc         |                          |
| 14CI         | 3215  | 0     | 7414 | 90.7%    | +      | 19q13.2  | AC092071.2/AC011541.7  | +        | +        | 89             |               |                          |
| 15CI         | 3040  | 375   | 7292 | 88.5%    | +      | Yp11.2   | AC007967.3             |          | +        |                |               |                          |
| 16CI         | 2887  | 16    | 7390 | 89.0%    | -      | Yp11.2   | AC016749.4             | +        | +        | 84             |               |                          |
| 17CI = 9C1b  | 2404  | 26    | 7410 | 88.3%    | -      | Yq11.221 | AC022486.4/AC007379.2  | +        | +        | 80             |               |                          |
| 18CI         | 1726  | 1330  | 7417 | 92.0%    | +      | 8q21.12  | AC068700.5/AC100854.2  |          | +        |                |               |                          |
| 19CI         | 1537  | 3839  | 7008 | 82.3%    | -      | 7q36.1   | AC069304.7             |          |          |                |               |                          |
| 21Cla        | 1299  | 0     | 7023 | 88.8%    | +      | Yq11.221 | AC007742.4             | +        | +        | 83             |               | ALR/Alpha, MER117, MER20 |
| 21C1b = 9C1a |       |       |      |          |        |          | AC022486.4/AC007379.2  |          |          |                |               |                          |
| 22CI         | 962   | 0     | 1461 | 86.1%    | -      | Yq11.221 | AC024183.4             | +        |          |                |               | ALR/Alpha                |
| 23CI = 9C1b  | 698   | 26    | 1056 | 86.9%    | +      | Yq11.221 | AC022486.4/AC007379.2  | +        | +        | 80             |               |                          |
| 38CI         | 209   | 7137  | 7414 | 88.4%    | +      | Yq11.221 | AC007379.2             |          |          |                |               |                          |

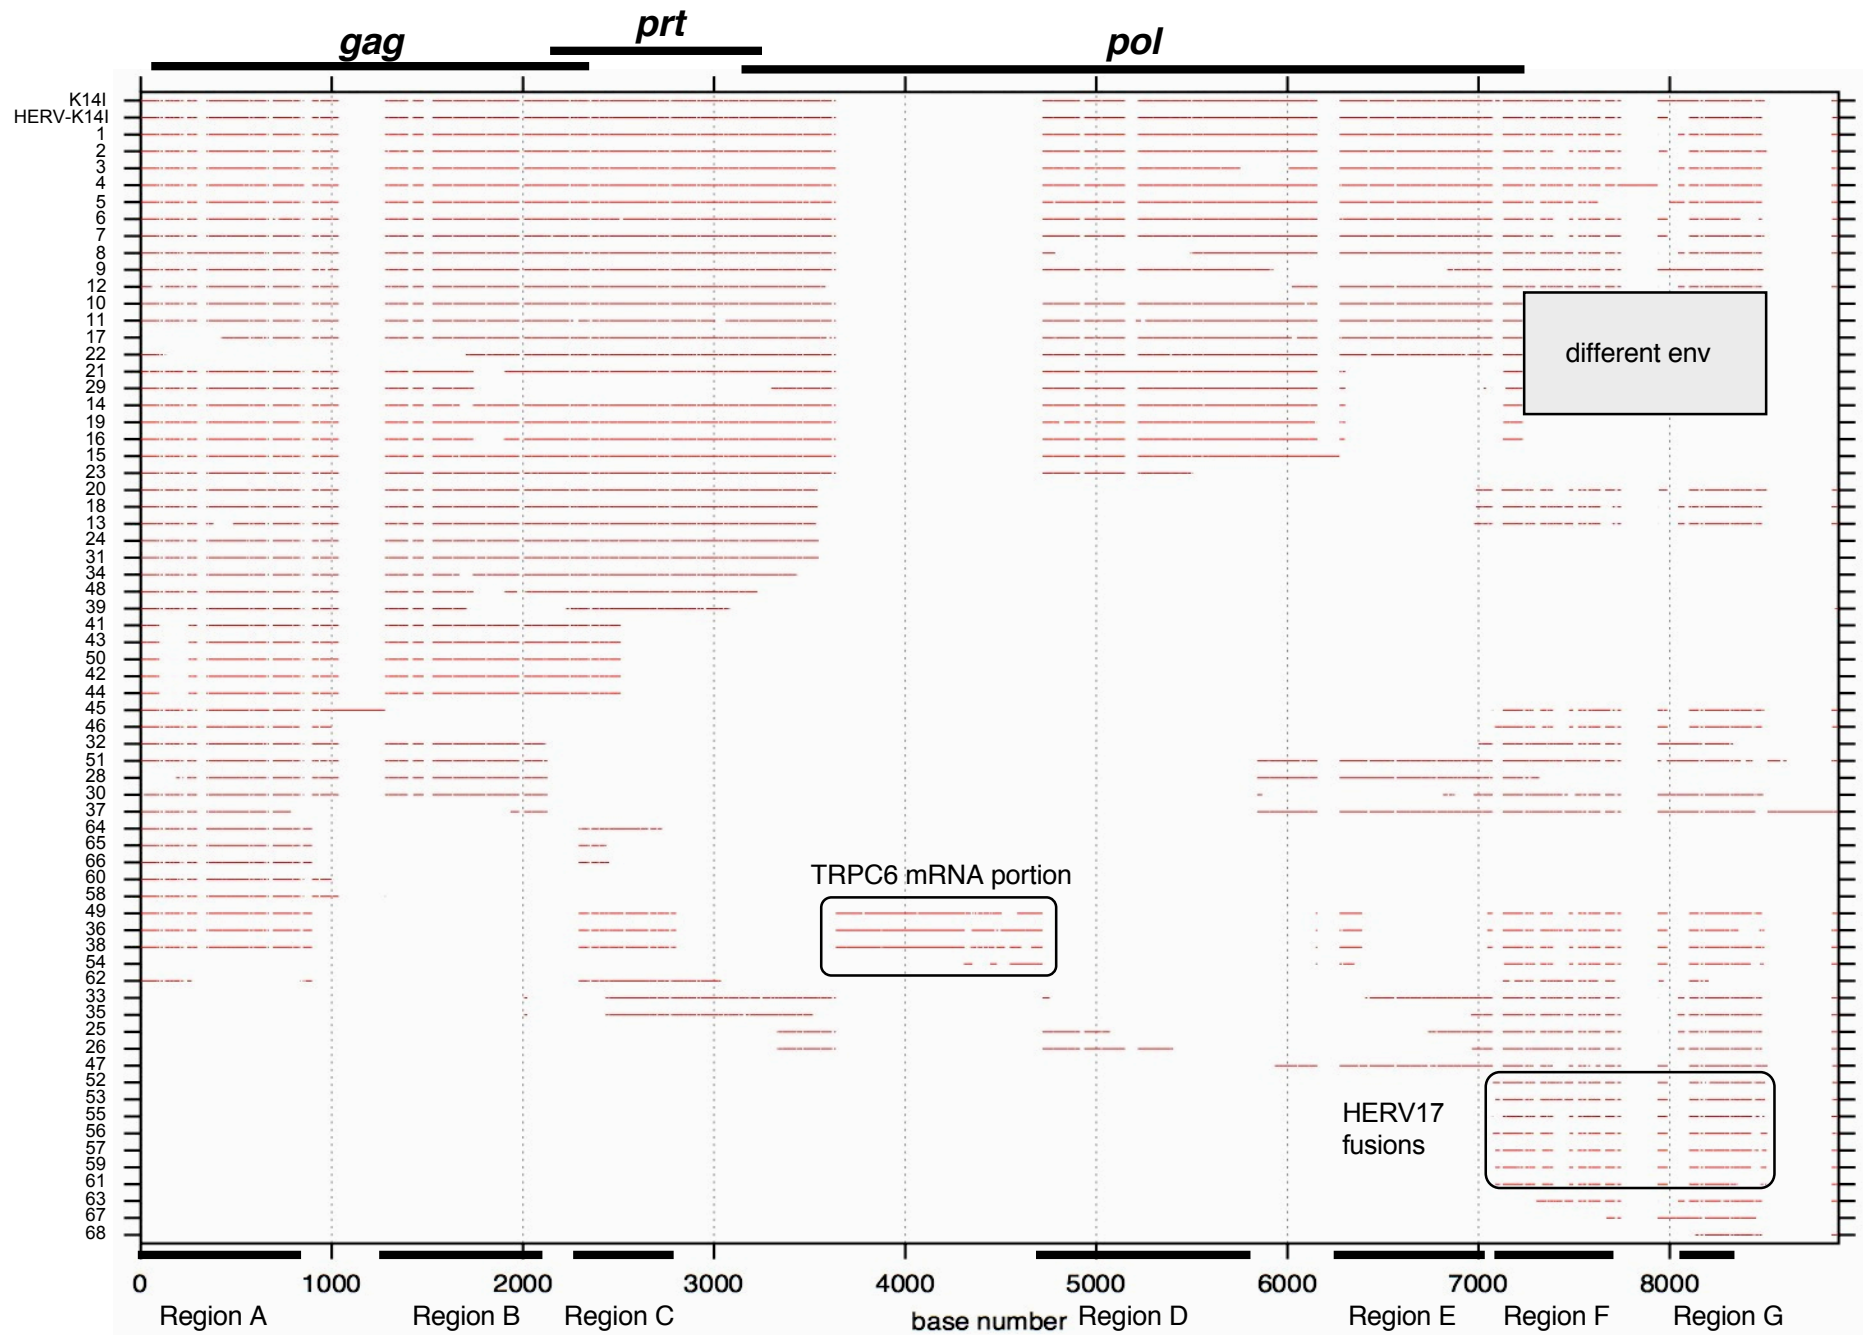

**Flockerzi et al., Suppl. Fig. A**

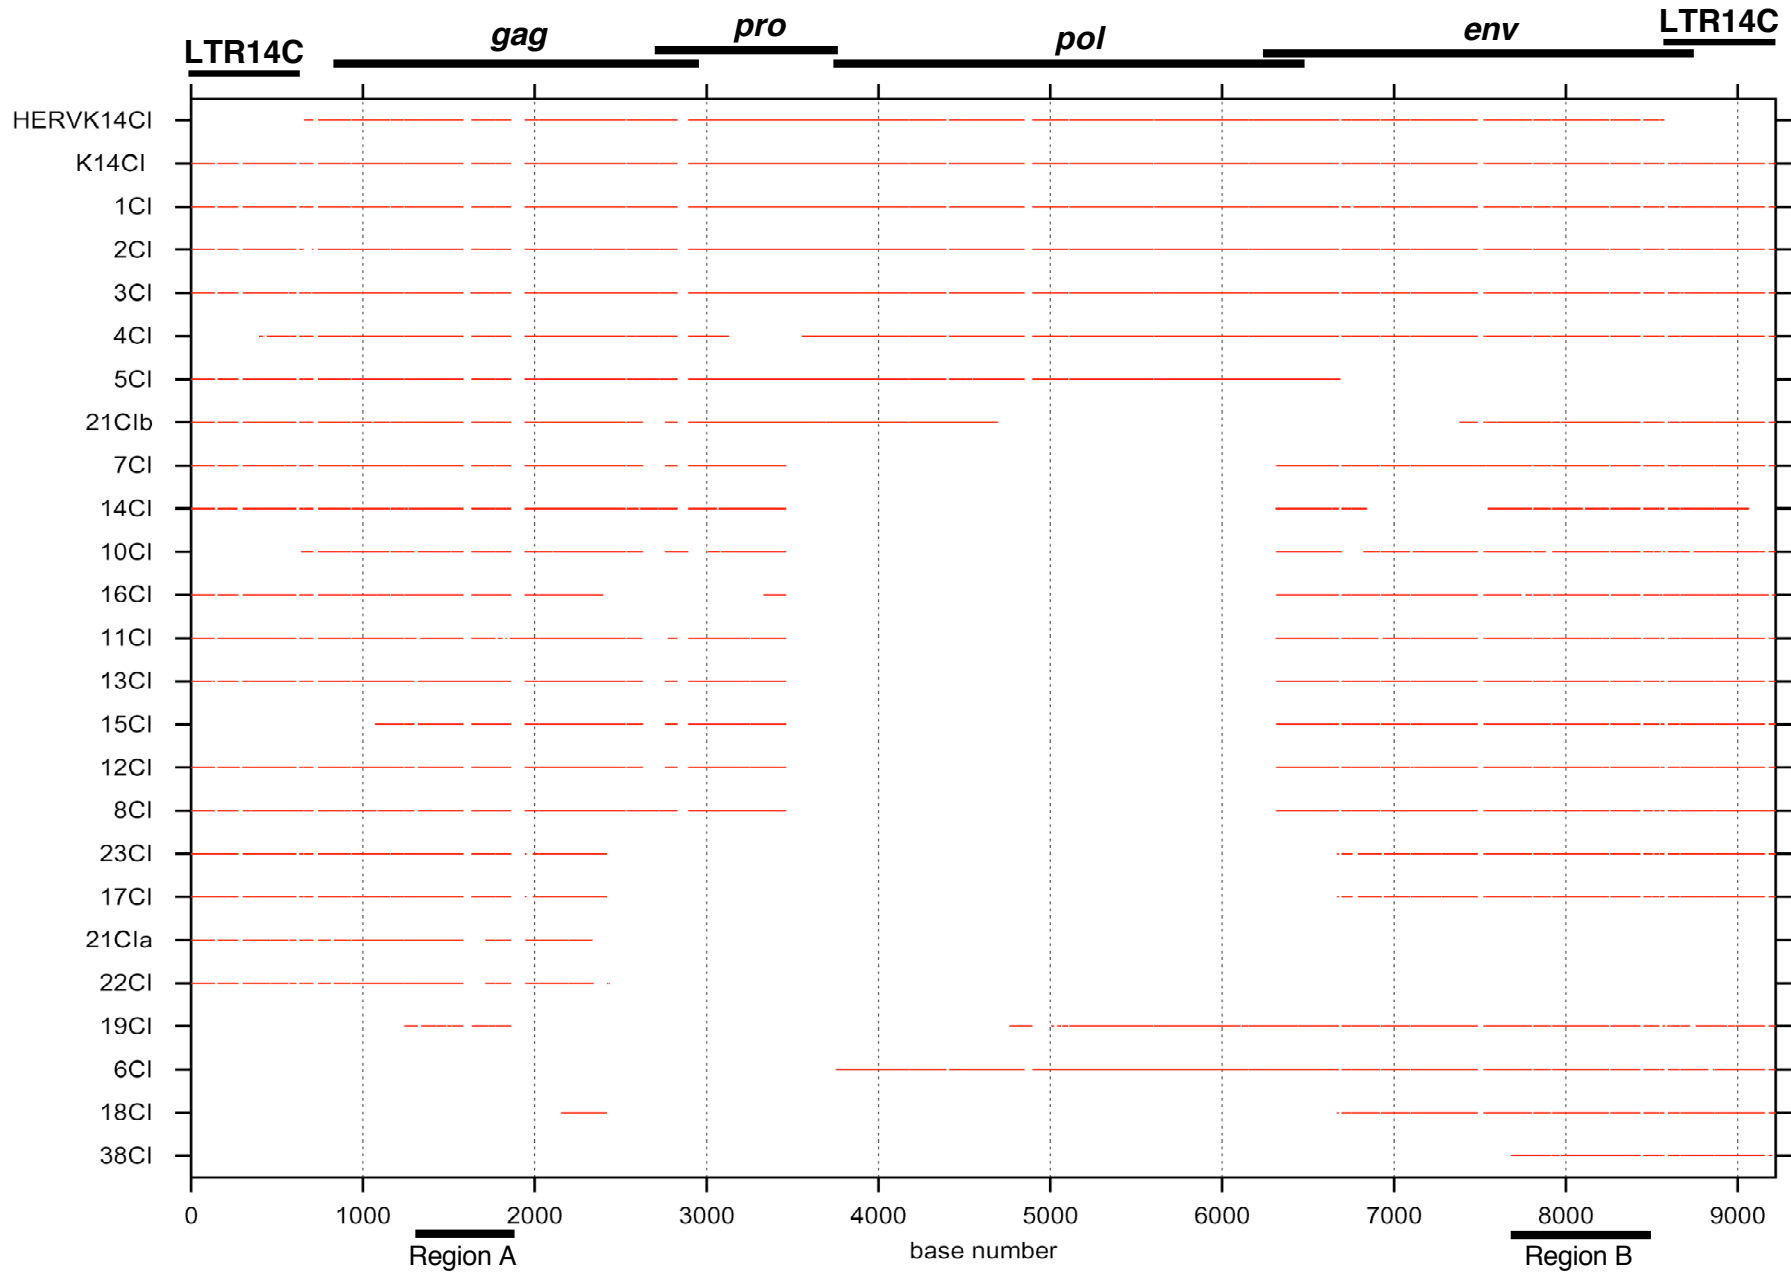

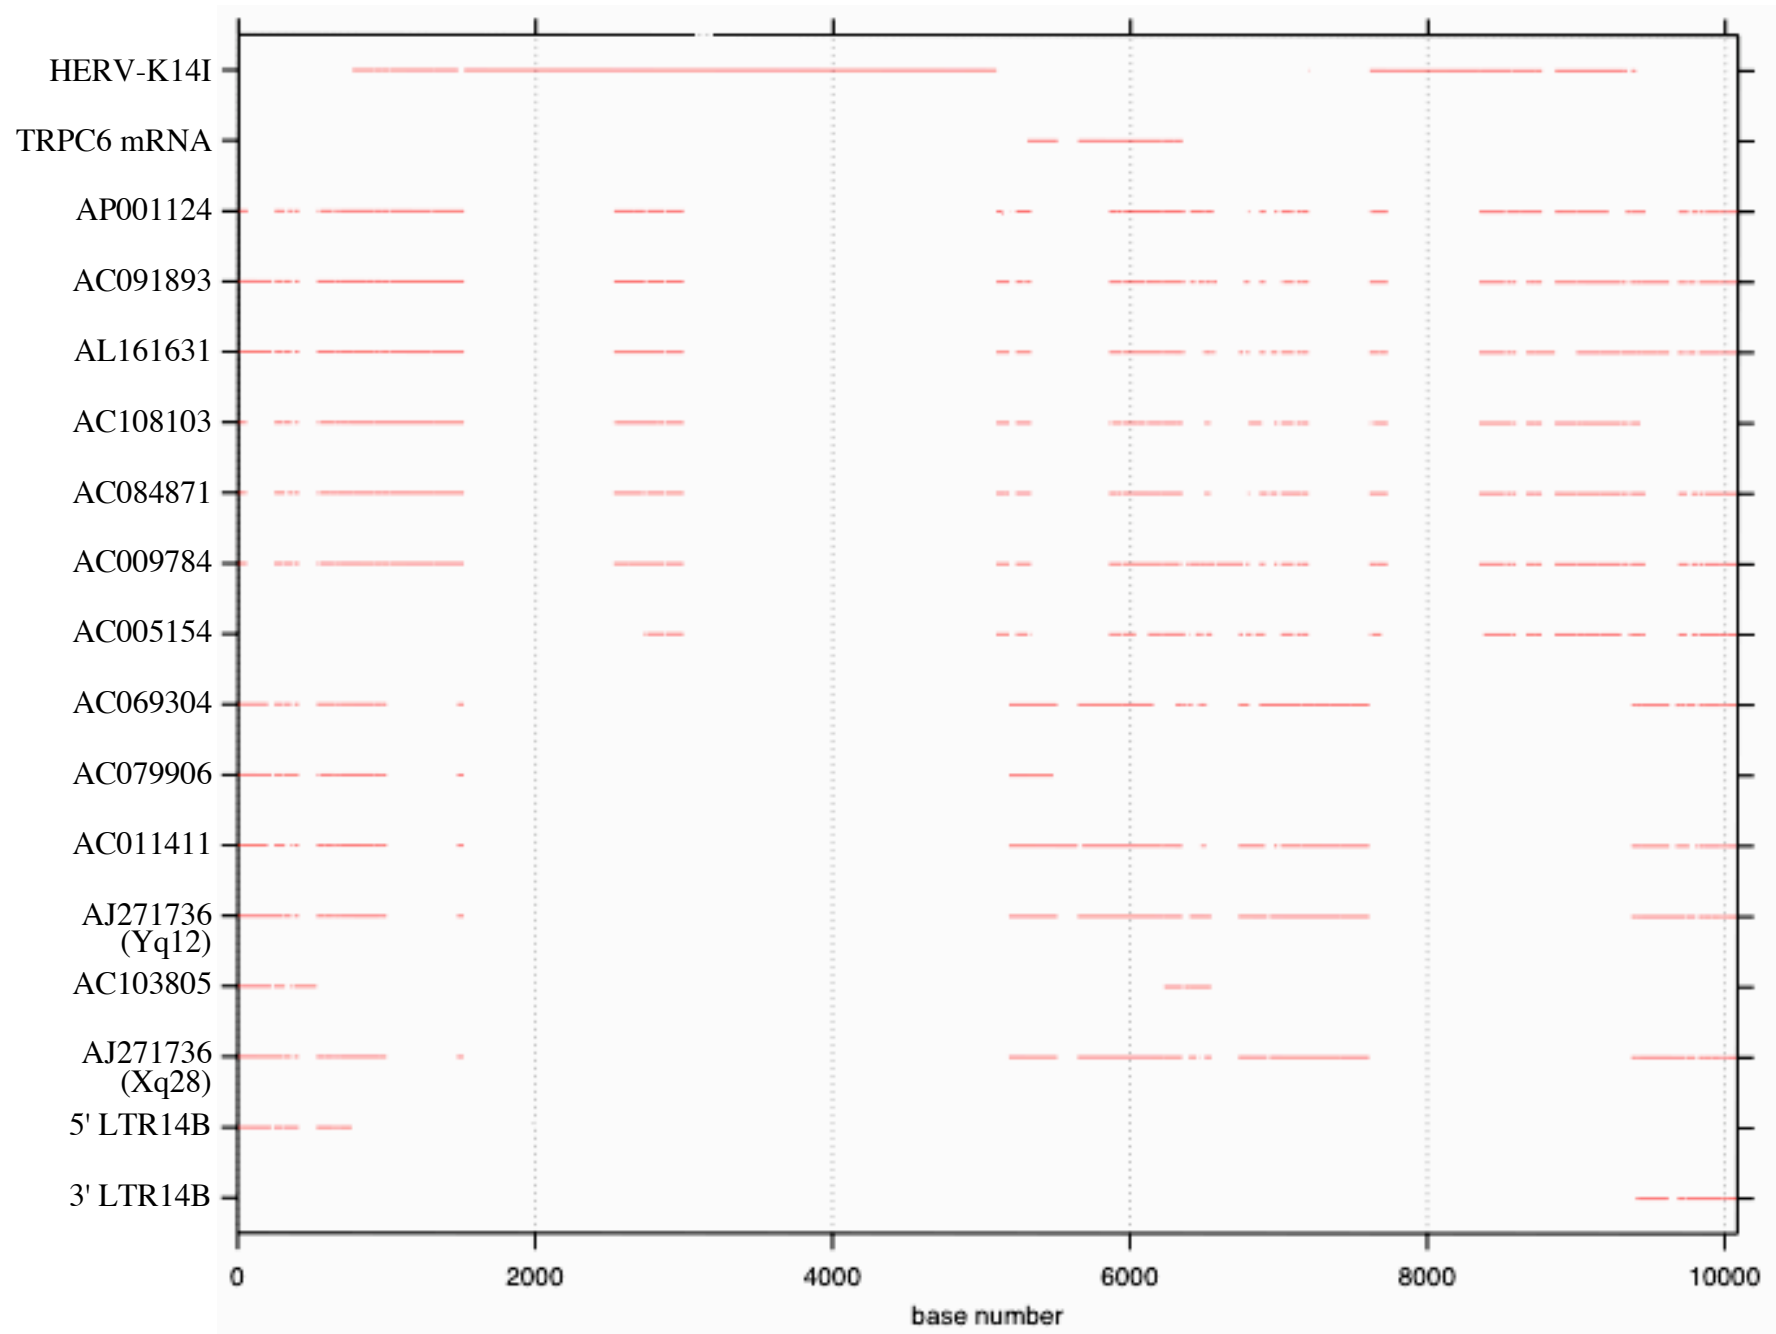

**Flockerzi et al., Suppl. Fig. C**

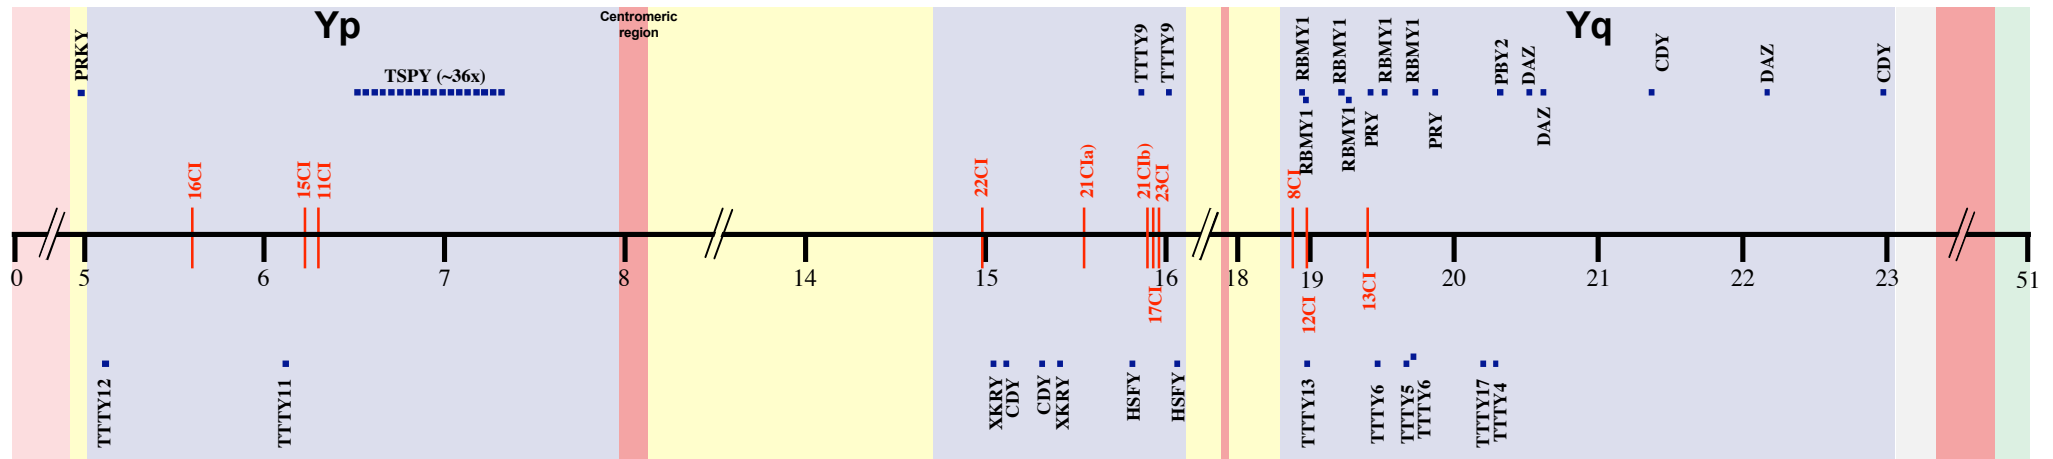

Suppl. Fig. D: Schematic localization of HERV-K14CI loci in intrachromosomally duplicated regions of the human Y chromosome. The figure is adapted from a recently published map of the human Y chromosome (Skaletsky et al. 2003) (ref. 38). Ampliconic regions, consisting of intrachromosomal duplications, are shown in blue. Heterochromatin, X-degenerate and pseudoautosomal regions are in red, yellow and green, respectively. The locations of several Y chromosome-located genes is shown. HERV-K14CI loci (red lines) were mapped according to their relative distances from those genes. Numbers refer to the ones given in Suppl. Table B. Only relevant regions of the Y chromosome are shown. The scale is in Mb.



3410 3420 3430 3440 3450 3460 3470 3480 3490 3500  
AAGAAAAATCAGGAAATGGAGAATGTTAAACAGATTAAAGGCTGTTAATGCTGTAATTCACCCATGGGTCACACTGCAACCAGGGCTGCCCTCCCCAA  
K K K S G K W R M L T D L R A V N A V I Q P M G A L Q P G L P S P>

3510 3520 3530 3540 3550 3560 3570 3580 3590 3600  
CAATGATCCAAAATACCTGGCCCTCTCATAGTGTAGATCTAAAGGATGCTTTTACCATTCCCTTAGCTGCCCAAGATTATGAAAAATTTGCTTTTAC  
T M I P K Y W P L I V I D L K D C F F T I P L A A Q D Y E K F A F T>

3610 3620 3630 3640 3650 3660 3670 3680 3690 3700  
TGTTCCGCATATAAAAGAACAGCAGGACAGATACCATTTGAAAGTACTACCAAGGCATGTTAAATAGCCCGACTATTTGTTCAAATTTATGTC  
V P A I N N K E A P A D R Y H W K V L P Q G M L N S P T I C Q T Y V>

3710 3720 3730 3740 3750 3760 3770 3780 3790 3800  
GGGAAAGCTTAAAGCCAGTTAGAGAACAGTTTAAAAAATGTTATATTACATTTACATGGATGATATTTTATGTGACAGCTGAAACATAGGGAAGATAA  
G K A I K P V R E Q F K K C Y I I H Y M D D I L C A A E T R E E L>

3810 3820 3830 3840 3850 3860 3870 3880 3890 3900  
TGTTATGCTACAAACAGTTAGAAAAGCTGTTAAATGCAGCAGGGTAAATATAGCCCCGATAAAAATCCAAACTTCTACTCCCTTTCAATATTTAGGAAT  
M L C Y K Q L E K A V N A A G L I I A P D K I Q T S T P F Q Y L G M>

3910 3920 3930 3940 3950 3960 3970 3980 3990 4000  
GAAGGTAGAACAAGTGTCTATTAGCCCTCAAAGGTTCAAATTCGAAGAGATAATTTAAAACTTTAAATGATTTTCAAAAATTTATTAGGAGACATTAA  
K V E Q S A I K P Q K V Q I R R D N L K T L N D F Q K L L G D I N>

4010 4020 4030 4040 4050 4060 4070 4080 4090 4100  
TGGATTCATCAACTTTAGGCATTCCTACCTATGCTATGTCTCACCTTTTCTACTTTACGAGGTGATTTAACTTAAACAGTAATGCTCCCTGTCCA  
W I H P T L G I P T Y A M S H L F S T L R G D S N L N S K C S L S>

4110 4120 4130 4140 4150 4160 4170 4180 4190 4200  
AAGAAGCATTTGGAGAACTCAATTAATTGAAGAAAAATTCACCAAGCACAAGTGAACAAATTAACCCCTATGACGCCATTACAGTTTGTAGTTTTC  
K E A L E E L Q L I E E K I Q Q A Q V K R I N P M Q P L Q F L V F P>

4210 4220 4230 4240 4250 4260 4270 4280 4290 4300  
TACTAACATTACACAGGAGTTTGTTCACAGGATGATCTGGTGTGGTGGCTTTTCTACCTCACAAATACAACAAAACAGCTCCTCTGACTTA  
T K H S P T G V I V Q Q D D L V E W L F L P H N T T K T L T L Y L>

4310 4320 4330 4340 4350 4360 4370 4380 4390 4400  
GATCAAAATGCTGTGCTAGTAGGACAAGCAGCTGCGCACAAAAGTTAATGGATATGATCCAAATCAGATTATAGTTCCATTAAACAAAACAA  
D Q I A V L V G Q A R L R T T K L M G Y D P N Q I I V P L T K Q Q>

4410 4420 4430 4440 4450 4460 4470 4480 4490 4500  
TTCAACAAGCTTATATTATCCAGGAATGGCAAGTTAATTTGGCAGGTTTTGGTGGCTTTTGTGATAATCATTAATCTTAACTAAAATTTCCAAAT  
I Q Q A Y I N S Q E W Q V N L A G F V G I L D N H Y P K S K I F Q F>

4510 4520 4530 4540 4550 4560 4570 4580 4590 4600  
TCTAAATTAACATCTGGATTTGCTTCTATTACTCAAAAAGCCCTATTGAAGGGGCATTACTGTTTTACTGATGGATCTAGTAATGAAAAAGCC  
L K L T S W I L P S I T Q K A P I E G A I T V F T D G S S N G K A>

4610 4620 4630 4640 4650 4660 4670 4680 4690 4700  
TCATTTGACAGGACCTCAACAACAAAGTTTTTCAAACGACTTTGCTTCTGCTCAAAAGGGCTGAACCTATGGCTGTGATAACAGTGTAAAAACTTTTAAAC  
S F A G P Q Q V F Q T D F A S A Q R A E L M A V I T V L K T F K>

4710 4720 4730 4740 4750 4760 4770 4780 4790 4800  
AGCCATGAACATTTCTGATTCAGCCTATGTAGTGAAGCCACACAAAATTTGAATGTGCTTAAATTCAAAATGCTGACTGTGAACAACTTAATCT  
Q P V N I V S A Y V V O A Q N I E C A L I O N V T D E Q L N L>

4810 4820 4830 4840 4850 4860 4870 4880 4890 4900  
TTTATTTTCACTTTTACAGCAAGCAGTACAACAAGCCATTTCCCTTTTCTATATCACTCATATGAGAGCACATACTAACCCTCCCTGGCCCTTTAACTAAA  
L F H S L Q Q A V Q Q R H S P F Y I T H M R A H T N L P G P L T K>

4910 4920 4930 4940 4950 4960 4970 4980 4990 5000  
CTTAATCAAAGGCCGATGCTTGTCTGACGCTTTGCTGATGCACAAACATTTCCATTCTTTAACCCCTTAAATGCTGACGGCTTAGAAAAAGAT  
L N Q R A D A L V S A A F A D A Q T F H S L T H L N A A G L R K R>

5010 5020 5030 5040 5050 5060 5070 5080 5090 5100  
ATGGTCTATCATGGAACAAGCTAAAGAAATTTGTCACAACACTGTTCTGCGCTGCCAAGTCTGCATCTGCCACATCAAGGAACAGGAGTTAACCCCTAGAGG  
Y G L S W K Q A K E I V Q H C S A C Q V L H L P H Q G T G V N P R G>

5110 5120 5130 5140 5150 5160 5170 5180 5190 5200  
TTTATCTCAAATTCATCTGGCAGATGGATGTAACACATATTCCTGCTTTTGGAAAATTTGCTCCTTTGTTTCATGTTTTCAGTAGATACCTATTACATTT  
L S P N S I W Q M D V T H I P A F G K L S F V H V S V D T Y S H F>

5210 5220 5230 5240 5250 5260 5270 5280 5290 5300  
ATCTGGGACATCTCAACAGGGGAAGCTACAGCTCATGTTAAAGACATCTTTTATCTTGTCTTTTCAGTTATGGGAAATCCCAAAAATCAAAACTG  
I W A T C T Q T G E A T A H V K R H L L S C I P S E V M G I P E K I K T>

5310 5320 5330 5340 5350 5360 5370 5380 5390 5400  
ATAACGGCCAGGATACGTAGTAAGCCATGGCTACATTTTTTCAACAATGGAATATTTACCATACTACGGGTATTTCCATATAACTCACAAGGACAAGC  
D N G P G Y C S K A M A T F F Q Q W N I T H T T G I P Y N S Q G Q A>

5410 5420 5430 5440 5450 5460 5470 5480 5490 5500  
AATAGTGAAGAAGAGCTAATCGTACTTTAAAACTCAAATAACAAGCAAAAGGAGGACCCAGGAATATAAAACACATATGCAATTTGCAATTTAGCT  
I V E R A N R T L K T Q I Q K Q K G G D Q E Y K T P H M Q L H L A>

5510 5520 5530 5540 5550 5560 5570 5580 5590 5600  
TTATTAACATTAATTTTAAATTTTACAAAAAGTACAACCCATGACTGACGCTGAACAACCTGACAGGACAAAAGGAAAATAAAAAGGCTGGACAAG  
L L T L N F L N L Q K D Q P M T A A E Q H L T G Q K E N K K A G Q>

5610 5620 5630 5640 5650 5660 5670 5680 5690 5700  
ATATATGTTGGAGGATGCACATACAAGAGCTGGGAAAAGGAAAGACAATATATGGGAAAGAGGATTTGCTTGTCTCTCCAGGTGACAATCAGGT  
D I W W R D A H T K S W E K G K T I I W G R G F A C V S P G D N Q V>

5710 5720 5730 5740 5750 5760 5770 5780 5790 5800  
GCCTGTGTTGGTGGCCACCAAACATCTGAAGATCTATCATGAGCCACAGACTAGTGGACCCACCTGTACAGTGCAAAATGAAGGTTTAAAGGATGCTT  
P V W V P T K H L K I Y H E P Q H L V D P P V Q C K L K V \*>

5810 5820 5830 5840 5850 5860 5870 5880 5890 5900  
TTTTGCTATACTGTTGCACAAGAAGGATAAGCCTCGATTGCTTTCTGTCGCTTCTGTTAATCAGAAGGGGCTGTTTCTCATTATCAGTGGTAAGTT  
5910 5920 5930 5940 5950 5960 5970 5980 5990 6000  
TTACCCCATGGTAATTAACAAAGAGGCAGAAGCTGATTTACAATGCTTCAGCAATGGCAGGCTCCCGGCTACAGCCACAAAAGTTTTTGTCTCTGTT  
6010 6020 6030 6040 6050 6060 6070 6080 6090 6100  
TCAGTAGATTTACTAACCTGGGGTGGGGTATGCTTGTGTTTTCAGGAGATGAACAACCGTGGATGACCCCTCAAGATGTGACAGCACCATGGAACA  
6110 6120 6130 6140 6150 6160 6170 6180 6190 6200  
GGAGACTGGAGGACCCATGGATCCCAACCATGGACCGGGTCCCCAGTATGAGCCATGAGCCAGTTGAATCTGAATCGGAAGATGGAACGAGGACCGA  
6210 6220 6230 6240 6250 6260 6270 6280 6290 6300  
CCAGAGTCACTGCTGACATCAACCCCATTAACATGGGACAGATCAAGAAAACCCACAGGAAGCTGAGAACTGCTGGAGCACAAGTTTTTACCATT  
6310 6320 6330 6340 6350 6360 6370 6380 6390 6400  
GCTGGGATTCAGAGTACAATAGATGCTTAACGGACCAATGCTTTCTGACTCAGCTTCTCTACCTCTGAATAACAAGAGACCCCTAATAGTTAGGACGAA  
6410 6420 6430 6440 6450 6460 6470 6480 6490 6500  
TATCATCGCCCCATTTCAGCATGAAGAAGTTACAGAAGACGGACCTTATCTTCTGCAACCCCTAGGATTAAGGGTCTCTTTGAAAACGGGAAAGGGG  
6510 6520 6530 6540 6550 6560 6570 6580 6590 6600  
AGATATGTTGGGAAGCATTCAAACAGAGGACCTCCATTTTGAATAAGGGCTAAGAAAATGAAGCTGGATCACCAACCGGCAATTAAGGGCTGCACAGCC  
6610 6620 6630 6640 6650 6660 6670 6680 6690 6700  
TGCAATTCCTTCTCAATTAATAAGAGGCCACCTTATGCTAGTAATATGATAGCTAGTAATAATGATGTTGCTTCTTTTACAAAAAGAGAGGGG PPT

6710 LTR 6720 6730 6740 6750 6760 6770 6780 6790 6800  
GGCATGGGAGAAAAGCTGAGTGTGGGAAAAGCTGAGGAGGGCTTGCATGCTGACATAATGAAAAGAGTCTTGAACATGTCCGGGTTCCAGGGTCT  
6810 6820 6830 6840 6850 6860 6870 6880 6890 6900  
AAAACCCCTCGTGGCCTTTGGAAACCAAGCTCTGTGCTAAAGGGTGAAGGCTACCCTGACGCCACATAATCTAAGCCAGGGCATAAAAACCCCTCGT  
6910 6920 6930 6940 6950 6960 6970 6980 6990 7000  
GCTTGGATAGAATCCAGGGCTCGTGGCCCTGGAATGTGCTAGACTGTGCTGCTTCTGCTCCTTCTCCAGGATCGATTGTATCTTTAGTTAAAA  
7010 7020 7030 7040 7050 7060 7070 7080 7090 7100  
GAACCTGCTCTCATTATCTCAAGTAGCAGAACATGTTCATATGCTCAAAGGAAATGCTAAAACCATCACAGCTGTAGATCATCGCTTAAATGCAACTT  
7110 7120 7130 7140 7150 7160 7170 7180 7190 7200  
GCCCTTCGACCCACATTTCTACCACCTGTTCTTTTGTGATCACAATAAATAGCTGGGCTTCCAGAGCTCGGGGCCCTTTGAGCCTCATACTT  
7210 7220 7230 7240 7250 7260 7270 7280 7290 7300  
AGCGTGGCCCCCTGACCCACTTTCTCTCAAATGCTTTTTCTATTTCTTTGACTCCCGCGGACTTCGTCACCCAGACCTGGTGGTGGTCTG  
7310  
ATCACCCCAACA

pol

LTR14B

RT

RNaseH

Integrase



# HERV-K14I, 3' portion, variant with putative *env* gene

5510 5520 5530 5540 5550 5560 5570 5580 5590 5600  
 TTATTAACATTAATTTTTTAAATTTACAAAAAGATCAACCCATGACTGCAGCTGAACAACACCTGACAGGACAAAAGAAAATAAAAGGGTGGACAAG  
 L L T L N F L N L Q K D Q P M T A A E Q H L T G Q K E N K K A G Q>

5610 5620 5630 5640 5650 5660 5670 5680 5690 5700  
 ATATATGGTGGAGGATGCACATACAAGAGCTGGGAAAAGGAAAGACAATATATGGGGAAGAGGATTTGCTTGTCTCTCCAGGTGACAATCAGGT  
 D I W W R D A H T K S W E K G K T I I W G R G F A C V S P G D N Q V>

5710 5720 5730 5740 5750 # 5760 5770 5780 5790 5800  
 GCCTGTGGGTGCCCAACATCTGAAGATCTATCATGAGCCACAGCAGGAAGAGGACTCTGGGAAGAGCCAGAACTCCCGATACGAGTGTGGC  
 P V W V P T K H L K I Y H E P Q Q E E R T L G R A R T P D T S D G>  
 \* R S I M S H S R K R G L W E E P E L P I R V M A>

5810 5820 5830 5840 5850 5860 5870 5880 5890 5900  
 ACAAATGAACATCTCAGAGACAAGGAAAAGCCGAGAATATCATCAGGCAGATCCTCCAACATGGGGACAAATCAAGAACTGGGCACAGATGGCAGAG  
 T N E H L R D K G K D R E Y S S G R S S N M G T N Q E T G T D G R>  
 Q M N I S E T K E K T E N T H Q A D P P T W G Q I K K L A Q M A E>

5910 5920 5930 5940 5950 5960 5970 5980 5990 6000  
 GACAACCTGAGAGCACAACAACCAAAAACAACTAGTAACCTAATGGTGGCCATGCTGGCAGTACTCACTGTGGCAGTAAGCCCTCCCTACTATAGGAG  
 G Q P E S T E Q T K N N \*  
 D N L R A Q N K P K T T S N L M V A M L A V L T V A V S L P T I G>

6010 6020 6030 6040 6050 6060 6070 6080 6090 6100  
 CAACTCAAATTTACTTTATTTGGGCATATGTCCTTCTCTTAAATTAGGTCTGTGAGTTGGATGGACCCCTGTTATTGAGGTGTACACCAATGACAG  
 A T Q N F T Y W A Y V P F P P L I R S V S W M D P V I E V Y T N D S>

6110 6120 6130 6140 6150 6160 6170 6180 6190 6200  
 TACCTGGATGCCTGAGCCATAGATAACAGAGGGCAATGCATCCTAATGAGGAAGGGATGAAAATGAATATATCAATAGGATATAAATATCTCCCAATA  
 T W M P E P I D N R G P M H P N E E G M K M N I S I G Y K Y P P I>

6210 6220 6230 6240 6250 6260 6270 6280 6290 6300  
 TGCCTGGGACCTGCTGGATGCTTACAAATGGCACACAAGTCTGGTGGCAGTAATCCCTGGAAAAATAAATCACAGGCTGCTTACATATGATTT  
 C L G P A A G C L Q I G T Q V W L A V I P G K N K S Q A A L H M I>

6310 6320 6330 6340 6350 6360 6370 6380 6390 6400  
 CAGGCAAAAGTTAAAAATAAACCTTCCAGCCCTAAAACCTCAGCAGTTCTATCCAAAACAGCTCAAATGTAACAAAATAGAGTTTGGTTGAAGGTGT  
 S G Q S L K Y N H S S P K T Q Q F Y P N K L K C K Q N R V W F E G V>

6410 6420 6430 6440 6450 6460 6470 6480 6490 6500  
 GGATGCTTGAATTTGGGAAGATTTGATAGCAAGTAAGGCTGAGGTGCTACAAAATAATTCCTATGGAATCGTCATTGATTTGGTCCCTAAGGGGATTTTT  
 D A W N W E D C I A S K A E V L Q N N S Y G I V I D W S P K G I F>

6510 6520 6530 6540 6550 6560 6570 6580 6590 6600  
 AAAAAAATGCACCAGAAGGCCTTCTGTAGAACAATAATAAACCGATGGAATCGTTGGCAACAGAATCATAACAATATATTCAGACAGAAGCTG  
 K K N C T R R P S C R T N I I N R W N R W Q Q N H T Q Y I Q T E A>

6610 6620 6630 6640 6650 6660 6670 6680 6690 6700  
 ATGTCCTATCATATGGAGTCTGTGGCATTGTCACCCCTAGTCCAAAATGATATCTCCTGCCATAGGACAGGAACATTCAGAATTATGGAATTAGC  
 D V P I I W S P G G I V T P S P K M I S P A I G Q E H S E L W K L A>

6710 6720 6730 6740 6750 6760 6770 6780 6790 6800  
 TATGGCTCAAAGTTCAATCAAATTTGGGAGGTAATAATAAGTATAAAGGGGAAGGTAAGATAAATATGTTCTTTCTTTCTTAAACAGG  
 M A Q S S I K I W E G K Y N K Y K G E G G K D K Y V L S F L S N R>

6810 6820 6830 6840 6850 6860 6870 6880 6890 6900  
 ACCTTTTGGATTCAAAGTTGTGTCCAGCCACCTTTTATGTTAGCAATAGGAAATATTAATCTTGCATATAAATCCCATTTTATCACCTGCCACGAAATGTC  
 T F W I Q S C V Q P P F M L A I G N I T L D I N T H F I T C H E C>

6910 6920 6930 6940 6950 6960 6970 6980 6990 7000  
 ACTTGTACTTGCATTAACCTCAACTTTTGATAAAAATCAAACCTATCTTGTAAATAGAGCCAGAGAAGGAGTTGGATCCCTGTGTCTCTAAATAGACC  
 H L F T C I N S T F D K N Q T I L L I R A R E G V W I P V S L N R P>

7010 7020 7030 7040 7050 7060 7070 7080 7090 7100  
 ATGGGAGGCATCACCATTCAATTTATAAAGTGAATCCTTAAAAAATTTTATCCCATCAAAGAAATTTATAGTTGCTCTTATATTTGCTATAATT  
 W E A S P S I H I I T E I L K K L L S H S K R F I V A L I F A I I>

7110 7120 7130 7140 7150 7160 7170 7180 7190 7200  
 GGCCTCATTGCTGTACCCTACTGCTGAGTAGTGGTGTGGCTTTACACTCATCTGTGCAAACTGTTAAATTTGTTGATAAATGGCAAAAGAAATCTTA  
 G L I A V T T T A A V A G V A L H S S V Q T V K F V D K W Q K N S>

7210 7220 7230 7240 7250 7260 7270 7280 7290 7300  
 CGAAATTTGAACTCTCAGGTTCAAACAGATCAAAAAATAGTTAATCAAATTAATGATCTCCGTGAGACAGTAATTTGGATGGGGGATCGTATCATAAG  
**T K L W N S Q V Q T D Q K I V N O I N D L R Q T V I W M G D R I I S>**

7310 7320 7330 7340 7350 7360 7370 7380 7390 7400  
 TTTAGAAACTAGAATTCAAATGCAATGTGATTTGGAATACATCTGACTTTTGCATTACTCCTCATAGTTATAATGAAACAGAACCAATGGGAAAAAGTT  
**L E T R I Q M Q C D W N T S D F C I T P H S Y N E T E H Q W E K V>**

7410 7420 7430 7440 7450 7460 7470 7480 7490 7500  
 AAATGCCATTTAGAAGGTAAGAGGAAATCTCTCCCTTGATATTGTAACCTGAAAGAGCAGGTTTGGAGCCCTCAGGCTCACTTAACCTGCTCT  
**K C H L E G K E E N L S L D I V K L K E Q V F E A S Q A H L T L L>**

7510 7520 7530 7540 7550 7560 7570 7580 7590 7600  
 CTGGAATGATATTTAAGCAAGCAGCTGATGGGTTGTCTGCAATCAATCTCTTAAATGGAATTAAGACCATTGGAAACGCTACACCTGTAACCTTGT  
**S G T D I L S K A A D G L S A I N P L K W I K T I G N A T P V N L V>**

7610 7620 7630 7640 7650 7660 7670 7680 7690 7700  
 TCTAATAATTATGTCTTGTGCTGCTCTGTTTCAGTCTACAGATGCAGAGCCACCTCTGGAGAGAAAGCCACCGCGAGAACAAGCAATGATAGCTGTG  
 L I I M C L C C L V S V Y R C R S H L W R E S H R R E Q A M I A V>

7710 7720 7730 **LTR** 7740 7750 7760 7770 7780 7790 7800  
 GCAGTTTTCGCAACAAAAAGAGAGACATGTTGGTAGAAGAGCTGAGGCAGGACTGGCTTGTCTGTCTAATGTAATAAGAGTCTTGAAGATGTCCTGG  
 A V L Q N K K E R H V G R R A E A G L A C L S \*

7810 7820 7830 7840 7850 7860 7870 7880 7890 7900  
 GTCCAGGGTCAAACCCCTCGTGGCTTTGGAAACCAAGCTCTGTGCCAAAGGTTGGAAGGCTGCCCTGCCGACCAACATCTAAGCCAGGGCATAA

pol

env

LTR14Bv PPT

GP36

|         |                                                                                                     |      |      |      |      |      |      |      |      |      |  |
|---------|-----------------------------------------------------------------------------------------------------|------|------|------|------|------|------|------|------|------|--|
| LTR14Bv | 7910                                                                                                | 7920 | 7930 | 7940 | 7950 | 7960 | 7970 | 7980 | 7990 | 8000 |  |
|         | AACCCCTTGTGGCTTGGATGGAACCCAGGGCTCAGGGCATAAAACCCCTTGTAGCCTCTGGAATGTGTCAGACTTGCTGGCTCCTTGCTTCTTGCTCTC |      |      |      |      |      |      |      |      |      |  |
|         | 8010                                                                                                | 8020 | 8030 | 8040 | 8050 | 8060 | 8070 | 8080 | 8090 | 8100 |  |
|         | CCAGGCTGTAAACATAATCTATCTTAACTCAAGCAACAGAGCATATCTATATCAAGTAGCAGAGCATGTTCCATATGCATCAAAGGAAATGCTAAACC  |      |      |      |      |      |      |      |      |      |  |
|         | 8110                                                                                                | 8120 | 8130 | 8140 | 8150 | 8160 | 8170 | 8180 | 8190 | 8200 |  |
|         | ATCACAGCTACGCTTGATGCACCACTACCTTTCTACCCCCACATCCTCAGCCCTCACCTGTTTACCCCCACATCTACATGTCCCTCACCACTGCTTCTT |      |      |      |      |      |      |      |      |      |  |
|         | 8210                                                                                                | 8220 | 8230 | 8240 | 8250 | 8260 | 8270 | 8280 | 8290 | 8300 |  |
|         | TGTTTGATCACCAATAAATAGTGTGGGCTCCAGAGCTCGGGGCCTTCACAGCCTCCATACTAGCGTTGGCCCCCTGGACCCACTTTATGCACTCTTAAC |      |      |      |      |      |      |      |      |      |  |
|         | 8310                                                                                                | 8320 | 8330 | 8340 | 8350 | 8360 | 8370 |      |      |      |  |
|         | TTGTCCTTTCTCATTCTTTGACTCTGCCGGACTTCGTAGCCCCATGGCCTGGTGTGGGTCTGATCACCCAACA                           |      |      |      |      |      |      |      |      |      |  |

Suppl Fig. E: Annotated HERV-K14I consensus sequences generated in this study. The first sequence is the HERV-K14I having about 800 bp of *env*-unrelated sequence downstream from the *pol* gene. The proviral body is flanked by LTR14B sequences. The second part of the figure presents the 3' portion of a consensus sequence for HERV-K14I proviruses with a putative *env* gene downstream from *pol*. The 3' LTR is represented by LTR14Bv, that is associated with *env*-having HERV-K14I proviruses (see text). The start of the different *pol-env* gene region is indicated (#). Locations of proviral open reading frames for *gag*, *pro*, *pol* and *env* genes, primer binding site (PBS) and polypurine tract (PPT) are indicated on the left. Protein domains, as revealed by CD-search, are indicated on the right and are underlined in the protein sequences. The presented sequence (HERV-K14I without *env*) has been deposited in Rebase.

LTR14C

PBS

gag

pro

10 20 30 40 50 60 70 80 90 100  
TGTGGGAAAGAGATTTCTGGGGTGCAGTTGAGTTGGTCTCCCTGTGTGAGACACCCATGGGAAGCCATGGGCGCCTCTGAGGAGAAAAGTCTCCTT

110 120 130 140 150 160 170 180 190 200  
ATTGCTTTCATGCTTTTATGCCCGGAGAGCATAACCGCTCAGCGGATTTCCACAGGTTGCTCAGGGAGATAACACTCCCTTGAAGCAGTGGAGTATAATC

210 220 230 240 250 260 270 280 290 300  
AAACATCTTGGTCTCTGAAACCCACTCCACCCGTTTCAGTCCCGATAAGTTAAAGATCTTAAGTAGTTTAGACACACGCTTTGCTCAAGGAAATT

310 320 330 340 350 360 370 380 390 400  
CACAGAAACCGCCACTGCTACACATCTTATCGAATGACTCACGAGTTCTCCTTACATGATTAATCCCTTTCTCATCCCTTCTCCCTCCCATCTGCC

410 420 430 440 450 460 470 480 490 500  
CTAAGAACAAGAGCTTGTAAACCAATAAATTGGTGGAGCCAAAGAGCTCTGGCCGCTGAGCAAGCTCCGATGCTCTGGTCCCTGGACCCGCTTTT

510 520 530 540 550 560 570 580 590 600  
AAACGCTTATTCTGTCTCTTTCTAACTCCTTTGTCTCCGCCGACTCGGGGTACCCACTGGGTGGTGTGGGGCTGGTTTCCCAACATCTGGTCCCCAAC

610 620 630 640 650 660 670 680 690 700  
CGCGGGCTCCCTATAATCTCTACAATAATCCAGTGAAGAAATGCCAGAGCTGGAAGAGTGGAGGACGACTGACAAAGACCGCCGAGTCTTTTCACT

710 720 730 740 750 760 770 780 790 800  
TCAAGCTCTACAGGTAAGTAGGGCACTCAGAGAATTCAGGGTAACCTCAGGAAAATATGGGTGAGCTGAAAGTAAGTTTGCCTAAATACCTTAAGCCCTGG

810 820 830 840 850 860 870 880 890 900  
TGCAGCAGTTATGTCACAGAGGGGTAATTTGAGTACCCAAAATCTCACATCTTTGTTCCATCTCATAGAAAAGTATTTCTCCTTGGTTCCTCCGAAAT

910 920 930 940 950 960 970 980 990 1000  
TGGAAACATGAATGTAAGAAATGGGACAGGTCGGACTCAGACTTAAACGAGCACAACAGAGGGCCACGATATCCCTTCTCCACTTGGTCTGTGTGG

1010 1020 1030 1040 1050 1060 1070 1080 1090 1100  
TCAGCAATTAACAGCAGTGGAGCCCTCCACACTGAGGAGGAGGAGGAGAAGTTTCAGGATGACATAGAAAAGTTTAATAATCAGGAGTCTGATGATC

1110 1120 1130 1140 1150 1160 1170 1180 1190 1200  
AGCAAAGTGAACCATCACAGTCTAGTTTAAAAAGGGGAGAAATGGGAAGCTATATATGCTAACCTCCAAAACTTATGAAAGAACAGTTCCACCTAC

1210 1220 1230 1240 1250 1260 1270 1280 1290 1300  
TGCAGAAACAGTGCACCTACTGCGCCTTAGGGGAAGTCCGGAATGGCCACCCACCTCAGCCTTATGAATTTTGGAAAYGGGAGCCTGAGACGGGG

1310 1320 1330 1340 1350 1360 1370 1380 1390 1400  
CTTGCCACTCCCATTTGTCACGCCCCACCATTAATATGGCAAAGGGAAGCTTCAGGCTTGCACCAACAGCCAATACAGTGGAGGATGATCCAGGCT

1410 1420 1430 1440 1450 1460 1470 1480 1490 1500  
GTCCACCTGTTAATATGTTAGAGGAATGCTGCAAGCCAGCCAAATACAAATATGGTGCAGGACAATCCAGGCTATCCATTTGCCAGGCACAGAAAT

1510 1520 1530 1540 1550 1560 1570 1580 1590 1600  
GGGGATTTGGATGCTTGGCAGTTTCTGGTAATATTTCTCCAGCTGAGGAGCCAGAGAACATGCTCAAGCATGCTGGGAGCCATTTCCTTTTAAAAATA

1610 1620 1630 1640 1650 1660 1670 1680 1690 1700  
TTAAAGACTTAAAGCAAGCAATTTGGACAATATGGGCCAAATTTCTCTTATGTTTCAATCTCTGTTTACAATCTGTGGCTTATAACCGGCATTAATACCTA

1710 1720 1730 1740 1750 1760 1770 1780 1790 1800  
TGGATTTGGGAGTCATTTAGCCCGATCCACCTGTCCCTCTCAATTTCTCAATTTTAAACCTGGTGGACAGATGAAGCAACAAATCAGGCATGCAGAAA

1810 1820 1830 1840 1850 1860 1870 1880 1890 1900  
TGCTCAAGCCCACTCCCATTAATATCACATCTGATCAATTTGGAATCGGACAGGATGGGGTACTGTAATCAACAGATGGTAAATGGGTGATGAG

1910 1920 1930 1940 1950 1960 1970 1980 1990 2000  
GCTGTTGATCAGCTCAGAATATATGCTTAAAGCCCTGGGAAAAATTCATGACCTGGTACTACTTATCTCTTTTAACTCAGTTCCAGAGGGTCCAA

2010 2020 2030 2040 2050 2060 2070 2080 2090 2100  
RGGAGCCTTATCCAGATTTTATCGCCATTTGCAAGACGCGGGCTCAAAGGCTATTTTGGATTCTCATGCCAGGAAAGTATGATCATTAGCTGCTTGCTTA

2110 2120 2130 2140 2150 2160 2170 2180 2190 2200  
TGAAATGCTAATACAGAATGTCAGGCAGCAATTTAGACCTATTAAGGGAAGGAGCAGATCTAAATGAGGAAAAAACTTTAAGTGAATACATTAAGCCCTGT

2210 2220 2230 2240 2250 2260 2270 2280 2290 2300  
GATGGCATTGGGGGGCATTATATAAGGCCAGCCTCCTTGTCTCAGCAATTTGGCTGGACTAAGGTAACAAAAACACACAGAGTGTCTCCCTGGATCTTCT

2310 2320 2330 2340 2350 2360 2370 2380 2390 2400  
ATAAATGTTGGACAGATAGGACATACAAAAGAGAGTGTACAAAAGAGCCAAAAGGCAAAACTCAGGAGGAAAAAGCAGGGAACAGGTACCTTTCTCTAG

2410 2420 2430 2440 2450 2460 2470 2480 2490 2500  
ATGTAATAAAGGAAAAACACTGGGCTAATCAATGCTATTCAAAGTTTGAATAACAGCGGACAGCCCTTCCCGGAAACGGACAGAGGGGGCCAGCCCCAGGCC

2510 2520 2530 2540 2550 2560 2570 2580 2590 2600  
CTGATTCAAAATGGGGCATTCCCAATTCAGGATGGGACTCCCTGACTCCAAACGGAGTGTCCAGCCAGTCTATCCCTGTACAATGTACAGCAAT

2610 2620 2630 2640 2650 2660 2670 2680 2690 2700  
GTCCCTCCACAGCTAAAAGTGGGGCAGTAGATTTATGCTGTACAAAAGCTGTATCCCTCCTTCTGGGAGCCCTCTAGGAAGGTCCCAATGGGAGTT

2710 2720 2730 2740 2750 2760 2770 2780 2790 2800  
TACGCCCATTTGCCAAATGGCAGGCTGGGACTTATACTGGGAAGTTCAGCTTAAACTTAAAGGGAATTCAGTACATCTGGAGTGTGGACTCTGTGAT

2810 2820 2830 2840 2850 2860 2870 2880 2890 2900  
GCCAGGAGAAATCAAATTTGTTATCTCTCCACTGTTCCCTGGAGTGTCTAAATCCAGGTGACAGAATAGCTCAACTGTTGCTTTTACCATATGTTAAGTT

2910 2920 2930 2940 2950 2960 2970 2980 2990 3000  
AGGAGAAAGCTCAGAAAAAGAACAGGAGATTTGGAAGCACAATTCAGCAGGCAAGGCTGCCTATTTGGGTAATCAAGTCTCTGACAATAGACCTATT

3010 3020 3030 3040 3050 3060 3070 3080 3090 3100  
TGTATGGTCACTATTCAAGAAAAACAATTTGAGGGTCTGGTGCACAGGAGCAGATGTGTCGATCATAGCTCTTTATCAATGGCCAAAACACTGGCCCA

P10

p24

ZnF

dUTPase

Protease

3110 3120 3130 3140 3150 3160 3170 3180 3190 3200  
AACAAAAGGCCAGTGGGTCTTGTGGGGTCCAGAACTGCTTCAGAAGTTCCTTCAAGAGTACTTTTATCTTACCATGCTCTGGTCCAGAAGAACAGGAAGG  
K Q K A P V G L V G V R T A S E V F Q S T F I L P C L G P E E Q E G >  
3210 3220 3230 3240 3250 3260 3270 3280 3290 3300  
CACATAAACTGTAAATATACCCATTCCCTGTTAACTTATGGGGGAGAGATCTGCTTCAGCAATGGGGCACAGAATAATTCATCCCTTCCCCGGTAT  
T I K P V I I P I P V N L W G R D L L Q Q W G T E I S I P S P R Y >  
3310 3320 3330 3340 3350 3360 3370 3380 3390 3400  
GGTCAAGCTAGTCAAAAATAATGTCAAACATGGGCTATGTTCCAGAAAAGGCCTAGGAAAACAGGACGGGCATTTGAACCCATACAGGTTACTG  
G Q A S Q K I M S N M G Y V P R K G L G K Q E T G I I E P I Q V T >  
3410 3420 3430 3440 3450 3460 3470 3480 3490 3500  
TAAAAATGACCGAAAAGTATAGTTACCATTTTTAGGGGTGGTCACTGTTGAGCCTCAAGTCTTCCCTTAAATGGAAGACCCAAAATCCTGTT  
V K N D R K G L G Y H F \*  
\* P K R I R L P F L G V V T V E P P S P I P L K W K T Q N P V >  
3510 3520 3530 3540 3550 3560 3570 3580 3590 3600  
TGGTCAAGCAGTGGCCACTTCTCAGAAAAATTTGGGGCCCTTACAGGAATAGTCAAGAGCAATTAACAAGGAACATTTGAGCCACATTTTCTC  
W V K Q W P L S Q E K L G A L Q E L V K E Q L N K G N I E P T F S >  
3610 3620 3630 3640 3650 3660 3670 3680 3690 3700  
CATGAATTCCGCGAGTGTGTTAATAAAGAAAAATCCGGCAGATGGCCGATGCTAACCGACTTACGAGCGGTCAATGCAGTCATCCAGCAATGGGGGC  
P W N S P V F V I K K K S G R W R M L T D L R A V N A V I Q P M G A >  
3710 3720 3730 3740 3750 3760 3770 3780 3790 3800  
CCTGCAGCAGGGCTTCATCCCCACCATGATTCCTAGAGACTGGCCATTAATAATATAGATTGAAGGATGCTTTTTAATATCCCTTAGCAGAG  
L Q P G L P S P T M I P R D W P L I I I D L K D C F F N I P L A E >  
3810 3820 3830 3840 3850 3860 3870 3880 3890 3900  
TCTGATTTGAGAAATTTGCTTTTACTATTCCTGCTATGAACAACAAGGAACAGCAGCAGATATCATTGGAAAGTCCGACAGGTTATGTTGAATA  
S D F E K F A F T I P A M N N K E P A A R Y H W K V L P Q G M L N >  
3910 3920 3930 3940 3950 3960 3970 3980 3990 4000  
GTCCTACTATTGTCAAACCTTTTGTGGGAAGGCTTCAACCTGTGAGAGATCAGTTCCAGATTGCTATATCATTATATATGACATATTTGTG  
S P T I C Q T F V G K A I Q P V R D Q F P D S Y I I H Y M D D I L C >  
4010 4020 4030 4040 4050 4060 4070 4080 4090 4100  
TGCGCCGAAAATCGAGCAACTTATCCAGTGTATTTCATATTTACAGGAGGTGGTCCCAATGCTGGATTGCTCATAGCACCAGATAAAAATTCAAACG  
A A E N R D Q L I Q C Y S Y L Q E V V A N A G L L A I A P D K I Q T >  
4110 4120 4130 4140 4150 4160 4170 4180 4190 4200  
GCCACTCTTTCCAAATATTTGGGAATGCAGGTTCCAGGAAAGGGCAATTAACCCCAAAAGGTTCAAATTCGAAAAGACTCTCGAAAACCTTTAAATGATT  
A T P F Q Y L G M Q V Q E R A I K P Q K V Q I R K D S L K T L N D >  
4210 4220 4230 4240 4250 4260 4270 4280 4290 4300  
TTCAAAAATTTAGGGATATCAATTTGGATTTCGACCTACTTTGGGAATCCCTACCTATGCTATGCTAACTGTTCTTATTTAAGAGGAGACCCCTGC  
F Q K L L G D I N W I R P T L G I P T Y A M S N L F S I L R G D P A >  
4310 4320 4330 4340 4350 4360 4370 4380 4390 4400  
TCTCAATAGTAAACGAGCACTGACTCTGAGGCTGACAAAAGAAATTAACAATGATTGAAGAAAAATACAACAGGCCAGGTTAATAGATAAGACTCAAGT  
L N S K R E L T P E A D K E L Q M I E E K I Q Q A Q V N R I D S S >  
4410 4420 4430 4440 4450 4460 4470 4480 4490 4500  
TTACCATCAGTTCATTTGTTCCCTACTCTCCTACTCTACAGGGTATAGTTCAGAGTGGAGACTAGTTGAATGGTCTTTTTCGCTCACATA  
L P L Q F I V F P T L H S P T G V I V Q S E D L V E W S F L P H N >  
4510 4520 4530 4540 4550 4560 4570 4580 4590 4600  
CTGTTAGAACACTCACAGTATACTTGGATCAGATGGCAATCTTGATTGGGCAAGCTACCTTAGAGTGTGTTAACTTTGTGGCTCAGATCCAGATAAGAT  
T V R T L T V Y L D Q M A I L I G Q A H L R V V K L C G S D P D K I >  
4610 4620 4630 4640 4650 4660 4670 4680 4690 4700  
TATAGTTCGAATGAATAAAATCAGATTCGGCAGCCCTTTGTTAATTTGGTCAATTTGGCAAATAAATTTAGTGGCTTCATTTGAGTCTTTGACAATCAC  
I V P M N K N Q I R Q A F V N L V N W Q I N L A G F I G V L D N H >  
4710 4720 4730 4740 4750 4760 4770 4780 4790 4800  
TATCCAAAACAATTTTTCAGTTTTAAAGCTAACAACATGGGCTTCCTCCAAAATACCATTGGTCTCCATTGGAAGGAGCAGTGTGTTTAA  
Y P K N N F F Q F L K L T T W V L P K I T H C A P L E G A V T V F >  
4810 4820 4830 4840 4850 4860 4870 4880 4890 4900  
CAGATGGCTCTAGCCATGGAAAAGCAGCTTATGTGGGCACTAAAACAGAAATTTCAAACACTGACTTTCAAATCGCCACAGAGGGCTGAATACAGGCAGT  
T D G S S H G K A A Y V G P K N R I I Q T D F Q S A Q R A E L Q A V >  
4910 4920 4930 4940 4950 4960 4970 4980 4990 5000  
TATAGCTGTGTTAGAAGCTTTAAGCAACCTGTAAATATTTGCTCTGCTTACAGCTTATGTTGTTCAAGCCACTCAATAGAACTGCACTCAATAAA  
I A V L E D F K Q P V N I V S D S A Y V V Q A T Q Y I E T A L I K >  
5010 5020 5030 5040 5050 5060 5070 5080 5090 5100  
TATCTTTGAGGATGAACAACCTATCATCTTTTCTTTTACAAAAGCAGTGGCTGCTACATATTTTCTTTCTATATCATGCACATTCGAGCATATA  
Y L V D E Q L Y Q L F S S L Q K A V R D H Y F P F Y I M H I R A Y >  
5110 5120 5130 5140 5150 5160 5170 5180 5190 5200  
CTAATCTCCCTGGGACCTTGTAAAGGCTAACGATCAAGCTGATTTACTAGTTTCCACTGTGCTTACTAATGCCCCAAGATTTTCACTCCCTAACCACTGT  
T N L P G T V V R A N D Q A D L L V S T V L T N A Q D F H S L T H V >  
5210 5220 5230 5240 5250 5260 5270 5280 5290 5300  
TAATGCAGCAGGACTTAAACAAAAATATCAAAATTAATGAGACAGGCAAAAGACATTTGTGCAACATTCGCCCTCAGTCCAGTACCAACTGCCACAT  
N A A G L K Q K Y Q I T W R Q A K D I V Q H C P Q C Q V L Q L P H >  
5310 5320 5330 5340 5350 5360 5370 5380 5390 5400  
GAAGGAGCTGGTGTAAACCCATGGGGATTAACCCCAATATGTTGTGGCAAATGGACGTAACCCATGTACCTTCACTGGGAAACTTTCATACGTCACATG  
E G T G V N P W G L T P N M L W Q M D V T H V P S F G K L S Y V H >  
5410 5420 5430 5440 5450 5460 5470 5480 5490 5500  
TTACTATAGATACCTTTTCTATTTTGTGGCAACTTGCACAAACAGGTTGAGGACGCTGCTCATATTAAGACATTTACTTTCTCTGTTTTCGCTGCCAT  
V T I D T F S H F V W A T C Q T G E A A A H I K R H L L S C F A A M >  
5510 5520 5530 5540 5550 5560 5570 5580 5590 5600  
GGGCATCCCAACAAAAGATTAACACAGCAATGGCCCAAGCTGATGTAATAACTTTTACAAAGCTTTCACAAAGCTTTCCTCAACAATGGCAGTACAGTACGGA  
G I P Q K I K T D N G P G Y C T S K S L Q A F L Q Q W H I E H S T G >  
5610 5620 5630 5640 5650 5660 5670 5680 5690 5700  
ATACCCATAAATTTCTCAAGGCCAAGCCATTTGTTGAACAGGCTAATCGAAACCTTAAATCTCAATTAACAAAACAAAAGACAGAGGGGGAAACACAGAAAT  
I P Y N S Q G Q A I V E Q A N R T L K S Q L Q K Q K T E G G T R E >  
5710 5720 5730 5740 5750 5760 5770 5780 5790 5800  
ACTCTACTCCCATATGAGCTACAATTTGGCTCTTATCACTTTAAATTTTTTGAATTTGCTTAGAGATCAGGTTACACAGCCAGCAGCAGCATTGAC  
Y S T P H M Q L Q L A L I T L N F L N L S R D Q V T T A A E Q H L T >  
5810 5820 5830 5840 5850 5860 5870 5880 5890 5900  
AGGGCAAAAATAAAATCCCTCATGAAGGAAAACATGTTGTTGGAAGGACGTCAGAAAACCTGGGAAAAGGGCAAAAATCATACATGGGGTGGGGGG  
G Q K I N P H E G K H V W W K D V S R T K T W E K G K I I T W G V R G >  
5910 5920 5930 5940 5950 5960 5970 5980 5990 6000  
TTTGGCTTGTATCTCAGCAGGAGAAATCAGCTTCTGGTGTGACCAAGACATCTTAAAGCTGTGCCATGAGCCAGAATCCAAGGAAGGAAAGAAAGA  
L L V S H C Q E R I S F L S G Y P Q D I L S C A M S Q T N P R K R K R >  
F A C I S P G E N Q L P V W V P T R H L K L C H E P E S K E E E K >

pro

pol

env

Protease

RT

RNaseH

Integrase

6010 6020 6030 6040 6050 6060 6070 6080 6090 6100  
 CCTCGGAACGTCCTGCACCCAGTTCATCAGATGAGTGAACATCTCTGTTGAGCAGATGGAAACCAGTAAACCTCACCAAGCACTCCACCGA  
 P R N V P A P P V H Q M A Q M N I S V V E Q M E T S K T H Q A T P P >  
 T S E R P C T P S S S D G S D E H L C \*

6110 6120 6130 6140 6150 6160 6170 6180 6190 6200  
 CCTGGGGGAGATGAAGGACTAGCTCACATTGCAGAAGAGAACCTGAGTCTCAGAACAGCTGCCTGACCACCAAGTAACTAATGGTAGCTATGATGGT  
 T W G Q M K R L A H I A E N L R S Q N K L L T T S N L M V A M M P >

6210 6220 6230 6240 6250 6260 6270 6280 6290 6300  
 GGTAATCTCCTGGTGGTGAAGTCTCCCCGAGTGGAGCAGATCAAAATACACTTATGGGCCTACATTCCATCCACCACCTGATAGCCCTGTTACA  
 V I S L V V S L P V A E A D Q N Y T Y W A Y I P F P P L I R P V T >

6310 6320 6330 6340 6350 6360 6370 6380 6390 6400  
 TGGTTAGACCCCGAGTGGAGTTTATGTTAATGATAGTGTCTGGATGGCTGGACCAACAGATAACCGAGGTCTACTCATCCAGAGGAGGAAGGAATGT  
 W L D P P V E V Y V N D S V W M P G P T D N R G P T H P E E E G M >

6410 6420 6430 6440 6450 6460 6470 6480 6490 6500  
 TAATGAATGTTTCCATGGTATCGCTTTCCTCCCATCGCTGGGCCAGCAGCAGGATGTTTAAATATGATAAAACAAAGTTGGATGGTATGATGCC  
 L M N V S I G Y R F P P I C L G P A C A G C L N Y D K Q S W M V Y V M >

6510 6520 6530 6540 6550 6560 6570 6580 6590 6600  
 TGCATAAATGGATCAAAAGCCTTATTCATGCAATCAGTGAAGAACAATTTCAATCTTTGGACACTATTAAATACCTTGAGCATGGCTATGTTATGACA  
 A H N G S A V A I H A I S G R T F Q S L D T I K Y L E H G I Y V M T >

6610 6620 6630 6640 6650 6660 6670 6680 6690 6700  
 CATCGCCAGATTAATAAATTTAAACCTAATAAGAAGCCCTGCCCTAGCAGGCCATAAATGGTCTGAAAAGCTAGAGGTGCTAACCTGGGAAGATTGTA  
 H R Q I N K F K P N K K P C P R Q A T K W S E K L E V L T W E D C >

6710 6720 6730 6740 6750 6760 6770 6780 6790 6800  
 TTGCAACAGCGCTGCTGACTGCAAAATAATTCCTATGGAATCATCTGATGGGCCCTTAGGGGACACTTTGCAGTAAATTTGACTGGACAGAGCAA  
 I A N S A A V L Q N N S Y G I I I D W A P R G H F A V N C T G Q S K >

6810 6820 6830 6840 6850 6860 6870 6880 6890 6900  
 AGATTGTAGAGACTCCTTTGCAATGACTACCCAGATAATGCACAAAATTTATAGAGAATGAAAACAAATTACCCTATTAAGTGGGAGGAGAAT  
 D C R E T P F A N D Y P D N A P K L Y R R I E T N Y P I K W E E M >

6910 6920 6930 6940 6950 6960 6970 6980 6990 7000  
 GGATGGCTCCTCCAAGCCCAAAATGATGATCCAATTATAAGTCCAGAACATCCAGAAATTTGTGGAATTAATGATGGCTCAAACCCCAATTCGGATT  
 G M A P P S P K M I D P I I S P E H P E L W K L M M A Q T P I R I >

7010 7020 7030 7040 7050 7060 7070 7080 7090 7100  
 GGAAGGAGAAATATAAACAGAGCCCATAGTAAAAAATTCGATTTGTTGAGCATTGACCTTAATCAGACGGTCCCATGACAGATGTTGTTAAACC  
 W K G E Y K T E T H S K K L R F V A M T S N Q T V P Q S C V K P >

7110 7120 7130 7140 7150 7160 7170 7180 7190 7200  
 TCCTTTATGTTGGCAGTGGGAAAAATTAATATCTACCTGACTCTCAAAACCATATGCTCAACTGTCTATCTTTTACCTGCATTAATTTACTCTTT  
 P F M L A V L I N I L P D S Q T I S C L N C H L F T C I N S T >

7210 7220 7230 7240 7250 7260 7270 7280 7290 7300  
 AATAAGGATAATAGCAATTTACTGGTTAGGGCCGAGAGGAGTTTGGATACCTGTTTCCCTCAATAGACCTTTGGGAGGCCTCTCCCTCCATACATATTA  
 N K D N S I L L V R A R E G V W I P V S L N R P W E A Q T P S I H I >

7310 7320 7330 7340 7350 7360 7370 7380 7390 7400  
 I T C T E V L K G I L N R S K R F I F T L I A V I M G L I A V T A T A >

7410 7420 7430 7440 7450 7460 7470 7480 7490 7500  
 TGCTGTGGTGTCTTGGCACTCTTATCAAACTGCGGGCTTTGGATAGTTGGCAGAAAAATTTCTTAAAGCTTTGGAATTTCCCAAAGCCAAATA  
 A A G V A L L H S I Q T A G F V D S W Q K N S S I K I >

7510 7520 7530 7540 7550 7560 7570 7580 7590 7600  
 GATCAAAAATGGCAAATCAAATTAATGATCTCCGTCAAACAGTAATTTGGATGGGAGATCGGATTAAGAGCTTGGAGCATAGAATCAAATGCAATGTG  
 D Q K L A N Q I T P S Y I W M G D R I M S L E H R I Q K C >

7610 7620 7630 7640 7650 7660 7670 7680 7690 7700  
 ATTGGAATCTCTGATTTTGTATTACTCTAGCTCTTATAATGCCACTGAACACCCATGGGAGATGATTAGACATCACCTACAGGAAAGAAAGATAA  
 D W N T S D I T P S Y I T E H H W E M I R H I Q K E A D N >

7710 7720 7730 7740 7750 7760 7770 7780 7790 7800  
 TTTAACAATTAGATATGCTAACTGAAAAACAACCTTTTGGAGCATCTCAGGCCTCACTCACCTGTTGCCTGGAGCTGATATTTCTGGAGCCACT  
 L T L D I A K L K K Q L F E A S Q A H L T L L P G A D I L A G A T >

7810 7820 7830 7840 7850 7860 7870 7880 7890 7900  
 GATGGCCTTCTAATACCAATCTTAAAGTGGATTAAACCATGATGGATCAACAATTTGCAAAATTTATTTTGGTGTGTCTGTTTATGCTGTTTGT  
 D G L S N T N P L K W I K T I G G S T I A N F I L V C V C L >

7910 7920 7930 7940 7950 7960 7970 7980 7990 8000  
 TTTTAGTCTACAGATCGAGACGGCACCTTGGGAGAGAAGCCAGACACCGTGAACGAGCATTGATAGCAATGGCGGTATTAATAAAAAAATAATAGAA  
 F L V Y R C R R H L G E A R H R E R A M I A M A V I N K K K L I E >

8010 8020 8030 8040 8050 8060 8070 8080 8090 8100  
 GACAAAAAAGGGGACATGTGGGAAAGAGAGTTTCTGGGTGCCAGTTGAGTTGGTCTCCCTGTGTGAGACACCCATGGGAAGCCATGGGGCCCTCTGT  
 T K K G D M W E R E F L G C Q L S W S P L C E T P M G S H G R P L >

8110 8120 8130 8140 8150 8160 8170 8180 8190 8200  
 AGGAGAAAAGTCTCCTTATTCCTTATGCTCTTTATGCCCCGAGAGCATAAACCGCTCAGCGCATTCACAGGTTGCTCAGGGAGATAACACTCCCTTGA  
 R R K V S L L P S C L Y A P R A \*

8210 8220 8230 8240 8250 8260 8270 8280 8290 8300  
 AGCAGTGGAGTATAATCAAACATCTTGGCTCCTCTGAAACCCACTCCACCCGTTTCAGTCCCGATAAGTTAAAGATCTTAAAGTATTAGACACACGC

8310 8320 8330 8340 8350 8360 8370 8380 8390 8400  
 CTTTGCCTCAAGGAAATCACAGAAACCGCCACTGCTACACATCTTATGGAATGACTCACGAGTTCTCCTTCACTGATTAATCTTTCTCCTCATCCCTTCC

8410 8420 8430 8440 8450 8460 8470 8480 8490 8500  
 TCCCTTCCCATCTGCCTAAGAACAAGAGCTTGTAAACCAATAAATTTGGTGGAGCCAAAGAGCTCTGGGCCGTGAGCAAGCCCTCCGATGCTCTGGTC

8510 8520 8530 8540 8550 8560 8570 8580 8590 8600  
 CCCGACCCGCTTTTAAACGCTTATCTGTCTTTCTAACTCCTTTGTCTCCGCGGACTCGGGGTACCCACTGGGTGGTGGGGTGGTTTCCCC  
 AACA

pol  
 env  
 PPT  
 LTR14C  
 LTR  
 GP36

**Suppl Fig. F:** Annotated HERV-K14CI consensus sequence generated in this study. The proviral body is flanked by LTR14C sequences. Locations of proviral open reading frames for *gag*, *pro*, *pol* and *env* genes, primer binding site (PBS) and polypurine tract (PPT) are indicated on the left. Protein domains, as revealed by CD-search, are indicated on the right and are underlined in the protein sequences. The presented sequence has been deposited in Repbase.
